## Whole Exome Sequencing in 20,197 Persons for Rare Variants in Alzheimer Disease

Neha S. Raghavan, PhD<sup>1,2</sup>, Adam M. Brickman, PhD<sup>1,2,3</sup>, Howard Andrews, PhD<sup>1,2,4</sup>, Jennifer J. Manly, PhD<sup>1,2,3</sup>, Nicole Schupf, PhD<sup>1,2,3</sup>, Rafael Lantigua, MD<sup>1,6</sup>, The Alzheimer's Disease Sequencing Project\*, Charles J. Wolock, BA<sup>8</sup>, Sitharthan Kamalakaran, PhD<sup>8</sup>, Slave Petrovski, PhD<sup>8,9</sup>, Giuseppe Tosto, MD, PhD<sup>1,2</sup>, Badri N. Vardarajan, PhD<sup>1,2,3</sup>, David B. Goldstein, PhD<sup>3,6,8</sup> and Richard Mayeux, MD<sup>1,2,3,4,7</sup>

KEYWORDS: Alzheimer's disease, Mutations, Whole Exome Sequencing

RUNNING TITLE: Ultra-Rare Variants and Alzheimer's disease

WORD COUNT: Abstract 250; Introduction 344; Discussion 1,125; Body 2,440

FIGURES AND TABLES: Figures 1; Tables 4; Supplemental Tables 2

CHARACTERS: Title 122; Running Head 43

<sup>1</sup>The Taub Institute for Research on Alzheimer's Disease and the Aging Brain, <sup>2</sup>The Gertrude H. Sergievsky Center, The Departments of <sup>3</sup>Neurology, <sup>4</sup>Psychiatry, <sup>5</sup>Systems Biology and <sup>6</sup>Medicine, at the College of Physicians and Surgeons, Columbia University, The New York Presbyterian Hospital, <sup>7</sup>The Department of Epidemiology, Mailman School of Public Health, <sup>8</sup>Institute of Genomic Medicine, Columbia University, The New York Presbyterian Hospital, New York, NY, USA, <sup>9</sup>AstraZeneca Centre for Genomics Research, Precision Medicine and Genomics, IMED Biotech Unit, AstraZeneca, Cambridge CB2 0AA, UK

\*Members listed by Institution in the supplement

### Correspondence:

Richard Mayeux, MD, MSc.  
Department of Neurology  
710 West 168<sup>th</sup> Street  
Columbia University  
New York, NY 10032  
Phone: 212-305-2391  
Email: rpm2@cumc.columbia.edu

## 1 **Abstract**

### 2 **Objective**

3 The genetic bases of Alzheimer's disease remain uncertain. An international effort to fully  
4 articulate genetic risks and protective factors is underway with the hope of identifying potential  
5 therapeutic targets and preventive strategies. The goal here was to identify and characterize  
6 the frequency and impact of rare and ultra-rare variants in Alzheimer's disease using whole  
7 exome sequencing in 20,197 individuals.

8

### 9 **Methods**

10 We used a gene-based collapsing analysis of loss-of-function ultra-rare variants in a case-  
11 control study design with data from the Washington Heights-Inwood Columbia Aging Project,  
12 the Alzheimer's Disease Sequencing Project and unrelated individuals from the Institute of  
13 Genomic Medicine at Columbia University.

14

### 15 **Results**

16 We identified 19 cases carrying extremely rare *SORL1* loss-of-function variants among a  
17 collection of 6,965 cases and a single loss-of-function variant among 13,252 controls ( $p = 2.17 \times$   
18  $10^{-8}$ ; OR 36.2 [95%CI 5.8 - 1493.0]). Age-at-onset was seven years earlier for patients with  
19 *SORL1* qualifying variant compared with non-carriers. No other gene attained a study-wide  
20 level of statistical significance, but multiple top-ranked genes, including *GRID2IP*, *WDR76* and  
21 *GRN*, were among candidates for follow-up studies.

22

### 23 **Interpretation**

24 This study implicates ultra-rare, loss-of-function variants in *SORL1* as a significant genetic risk  
25 factor for Alzheimer's disease and provides a comprehensive dataset comparing the burden of  
26 rare variation in nearly all human genes in Alzheimer's disease cases and controls. This is the

27 first investigation to establish a genome-wide statistically significant association between  
28 multiple extremely rare loss-of-function variants in *SORL1* and Alzheimer's disease in a large  
29 whole-exome study of unrelated cases and controls.

30

## 31 Introduction

32 Alzheimer's disease (AD) is a highly prevalent disorder that dramatically increases in frequency  
33 with age, and has no effective treatment or means of prevention. While three causal genes,  
34 Amyloid Precursor Protein (*APP*), Presenilin 1 and 2 (*PSEN1* and *PSEN2*), have been  
35 established for early-onset AD (age of onset <65 years of age), the rest of the heritability is still  
36 unknown. Further, beyond Apolipoprotein E (*APOE*), which confers the greatest risk for late-  
37 onset AD (age of onset ≥65 years of age), there remains a large gap in the understanding of its  
38 causes. Identifying genetic variants that increase risk or protect against AD is considered an  
39 international imperative because of the potential therapeutic targets that may be revealed.  
40 Recent technological advances in genome-wide association studies and high throughput next-  
41 generation sequencing may help to implicate variants in genes in specific molecular pathways  
42 relevant to AD.

43  
44 In this study, we used whole-exome sequencing to investigate all protein-coding genes in the  
45 genome focusing on ultra-rare (allele frequency less than 0.01%) and putatively deleterious  
46 variants. Rare variants are hypothesized to contribute to disease<sup>1,2</sup>, and studies of complex  
47 traits in population genetic models indicate an inverse relationship between the odds ratio and  
48 effect size conferred by rare variants and low allele frequencies<sup>3</sup>. Thus, we searched for large  
49 effects conferred by putatively causal ultra-rare variants. Traditional single variant statistics can  
50 be underpowered because patients with similar clinical presentations possess distinct rare  
51 variants that inflict similar effects on the gene<sup>4</sup>. Gene-based collapsing analyses increase signal  
52 detection by aggregating individual qualifying variants within an *a priori* region (e.g., a gene),  
53 facilitating detection of genes associated with disease through a specific class of genetic  
54 variation (e.g., loss-of-function variants).

55

56 In order to maximize the ability to detect ultra-rare variants associated with AD, exome-  
57 sequencing data of 20,197 cases and controls from the Washington Heights-Inwood Community  
58 Aging Project (WHICAP), the Alzheimer's Disease Sequencing Project (ADSP) and unrelated  
59 controls from the Institute of Genomic Medicine were systematically combined and analyzed  
60 using a collapsing method with proven prior success in identifying disease associated genes <sup>5, 6</sup>.

61

## 62 **Methods**

63 The three groups used in this study and their sequencing information are described below.

64 **Washington Heights-Inwood Community Aging Project.** The WHICAP study consisted of a  
65 multi-ethnic cohort of 4,100 individuals followed over several years. The cohort participants were  
66 non-demented initially, 65 years of age or older, and comprised of non-Hispanic whites, African  
67 Americans, and Caribbean Hispanics from the Dominican Republic. During each assessment,  
68 participants received a neuropsychological test battery, medical interview, and were re-  
69 consented for sharing of genetic information and autopsy. A consensus diagnosis was derived  
70 for each participant by experienced clinicians based on NINCDS-ADRDA criteria for possible,  
71 probable, or definite AD, or moderate or high likelihood of neuropathological criteria of AD <sup>7</sup>,  
72 <sup>8</sup>. Every individual with whole-exome sequencing has at least a baseline and one follow-up  
73 assessment and examination, and for those who have died, the presence or absence of  
74 dementia was determined using a brief, validated telephone interview with participant  
75 informants: the Dementia Questionnaire (DQ) <sup>9</sup> and the Telephone Interview of Cognitive Status  
76 (TICS) <sup>10</sup>. 3,702 exome-sequenced WHICAP individuals were designated with case or control  
77 status and included in this analysis. From the sequenced cohort, 27% died and less than 1%  
78 were lost at follow-up.

79

80 **Alzheimer's Disease Sequencing Project.** The ADSP, developed by the National Institute on  
81 Aging (NIA) and National Human Genome Research Institute (NHGRI) includes a large case-

82 control cohort of approximately 10,000 individuals<sup>7</sup>. The recruitment of these individuals was in  
83 collaboration with the Alzheimer's Disease Genetics Consortium and the Cohorts for Heart and  
84 Aging Research in Genomic Epidemiology Consortium. The details and rationale for the case-  
85 control selection process have been previously described<sup>7</sup>. All cases and controls were at least  
86 60 years old and were chosen based on sex, age and *APOE* status: 1) controls were evaluated  
87 for their underlying risk for AD and for their likelihood of conversion to AD by age 85, based on  
88 age at last examination, sex, and *APOE* genotype, and those with the least risk for conversion  
89 to AD were selected, and 2) cases were evaluated for their underlying risk for AD based on age  
90 at onset, sex, and *APOE* genotype and those with a diagnosis least explained by these factors  
91 were selected<sup>7</sup>. Cases were determined either because they met NINCDS-ADRDA clinical  
92 criteria for AD, or postmortem findings met moderate or high likelihood of neuropathological  
93 criteria of AD<sup>7,8</sup>. Autopsy data was available for 28.7% of the cases and controls used in the  
94 analysis. Further, some cases were originally diagnosed clinically, subsequently died and had  
95 neuropathological findings available after postmortem examination. Cases had documented age  
96 at onset or age at death (for pathologically determined cases). Controls were free of dementia  
97 by direct, documented cognitive assessment or neuropathological results. The ADSP group  
98 consisted of European-Americans and Caribbean Hispanics. All data were available for  
99 download for approved investigators at The National Institute on Aging Genetics of Alzheimer's  
100 Disease Data Storage Site website (<https://www.niagads.org/adsp/content/home>). As part of the  
101 ADSP, 116 non-Hispanic white WHICAP controls and 34 cases previously sequenced were  
102 included here.

103

104 **Additional Controls.** The Institute for Genomic Medicine (IGM) (Columbia University Medical  
105 Center, New York, NY) hosts an internal database of sequencing data collected from previously  
106 exome-sequenced material. In this study, exome-sequencing data from 6,395 IGM controls  
107 were utilized. All data used were previously consented for future control use from multiple

108 studies of various phenotypes. The cohort was made up of 55.7% healthy controls and 46.3%  
109 with diseases not co-morbid with AD (disease classifications shown in Supplemental Table 1).  
110 Although the cohort of controls were not enriched for any neurological disorder or diseases with  
111 a known co-morbidity with AD, presence or future possibility of AD could not be excluded based  
112 on the available clinical data. individuals with Age and *APOE* status were not available for these  
113 participants. The cohort comprised of 70% non-Hispanic white individuals along with those of  
114 African American, Hispanic, Middle Eastern, Asian and unknown descent.

115

### 116 **Sequencing, Quality Control and Variant Calling**

117 Whole-exome sequencing of the WHICAP cohort was performed at Columbia University. The  
118 additional controls were sequenced at Duke University and Columbia University. Whole-exome  
119 sequencing of the ADSP cohort was performed at The Human Genome Sequencing Center,  
120 Baylor College of Medicine, Houston, Texas; The Broad Institute Sequencing Platform, The Eli  
121 & Edythe L. Broad Institute of the Massachusetts Institute of Technology and Harvard  
122 University, Cambridge Massachusetts and Washington University Genome Sequencing Center,  
123 Washington University School of Medicine, Saint Louis, Missouri. ADSP raw files in the  
124 sequencing read archive format were downloaded from the dbGAP database and  
125 decompressed to obtain FASTQ files.

126

127 All data were reprocessed for a consistent alignment and variant calling pipeline consisting of  
128 the primary alignment and duplicate marking using the Dynamic Read Analysis for Genomics  
129 (DRAGEN) platform followed by variant calling according to best practices outlined in Genome  
130 Analysis Tool Kit (GATK v3.6). Briefly, aligned reads were processed for indel realignment  
131 followed by base quality recalibration and Haplotype calling to generate variant calls. Variant  
132 calls were then subject to Variant Quality Score Recalibration (VQSR) using the known single  
133 nucleotide variants (SNVs) sites from HapMap v3.3, dbSNP, and the Omni chip array from the

134 1000 Genomes Project. SNVs were required to achieve a tranche of 99.9% and indels a  
135 tranche of 95%. Finally, read-backed phasing was performed to determine phased SNVs and  
136 merge multinucleotide variants (MNVs) when appropriate. Variants were annotated using Clin-  
137 Eff with Ensembl-GRCh37.73 annotations.

138  
139 Quality thresholds were set based on previous work<sup>5, 6</sup>, such that all resulting exome variants  
140 had a quality score of at least 50, quality by depth score of at least 2, genotype quality score of  
141 at least 20, read position rank sum of at least -3, mapping quality score of at least 40, mapping  
142 quality rank sum greater than -10, and a minimum coverage of at least 10. SNVs had a  
143 maximum Fisher's strand bias of 60, while indels had a maximum of 200. For heterozygous  
144 genotypes, the alternative allele ratio was required to be greater than or equal to 25% and  
145 variant from sequencing artifacts and exome variant server failures  
146 (<http://evs.gs.washington.edu/EVS>) were excluded.

147  
148 Quality control was performed on all sequencing data. Samples with less than 90% of the  
149 consensus coding sequence (CCDS) covered at 10X and samples with sex-discordance  
150 between clinical and genetic data were excluded from the analysis. Cryptic relatedness testing  
151 was performed using KING, and second degree or closer (relatedness threshold of 0.0884 or  
152 greater) relatives were removed with preferential retention of cases over controls and  
153 subsequently samples with higher average read-depth coverage.

154  
155 The consensus coding sequence<sup>11</sup> (CCDS) annotated protein-coding region for each gene  
156 (n=18,834) was tabulated as either carrying or not carrying a qualifying variant for every  
157 individual. Qualifying variants were defined for a loss-of-function model: stop gain, frameshift,  
158 splice site acceptor, splice site donor, start lost, or exon deleted variants. A negative control  
159 analysis was performed defining qualifying variants as synonymous variants to detect potential



160 biases in variant calling between the cases and controls separately for each of the top four  
161 genes. The minor allele frequency threshold was 0.01% internally and within African American,  
162 Latino and Non-Finnish European populations from the Exome Aggregation Consortium<sup>12</sup>  
163 (ExAC release version 0.3.1). The allele frequency thresholds use a “leave-one-out” method for  
164 the combined test cohort of cases and controls such that the minor allele frequency of each  
165 variant was calculated using all individuals except for the index sample under investigation.  
166 Thus, the maximum instances of a single variant a gene in our sample of 20,197 was five. A  
167 dominant model was defined such that one or more qualifying variant(s) in a gene qualified the  
168 gene.

169  
170 An important aspect of the collapsing analysis methodology is the reduction of variant calling  
171 bias due to coverage differences between cases and controls. To ensure balanced sequencing  
172 coverage of evaluated sites between cases and controls, we imposed a statistical test of  
173 independence between the case/control status and coverage. For a given site, consider  $s$  total  
174 number of cases,  $t$  total number of controls and  $x$  number of cases covered at 10X,  $y$  number of  
175 controls covered at 10x. We model the number of covered cases  $X$  as a Binomial random  
176 variable:

$$177 \quad X \sim \text{bin}(n = \text{number covered samples}, p = P(\text{case}|\text{covered}))$$

178 If case/control status and coverage status are independent, then:

$$179 \quad P(\text{case}|\text{covered}) = P(\text{case}) = s/(s+t)$$

180 We can test for this independence by performing a two-sided Binomial test on the number of  
181 covered samples at given site,  $x$ .

$$182 \quad \text{BinomTest}(k=x, n=x+y, p=s/(s+t))$$

183

184 In the collapsing analyses, a binomial test for coverage balance as described above was  
185 completed as an additional qualifying criterion. Any site which resulted in a nominal significance  
186 threshold of 0.05 was eliminated from further consideration.

187 A Fisher's exact test on qualifying variants in cases and controls for each gene was performed  
188 and imbalances in cases and controls within a gene indicated a possible association with the  
189 case-ascertained phenotype. Ultra-rare variant analyses were conducted using Analysis Tools  
190 for Annotated Variants (ATAV), developed and maintained by the Institute for Genomic  
191 Medicine at Columbia University. Study-wise significance was set to  $0.05/18,834$  (# of genes  
192 tested) =  $2.7 \times 10^{-6}$ . Fisher's Exact Test for the polygenic comparison of International Genetics of  
193 Alzheimer's Project (IGAP) loci<sup>13</sup> and t-test for age of onset-analysis (presented as mean +/-  
194 standard deviation) were conducted in R v.3.3.1.

195

## 196 **Results**

197 We analyzed the exomes of 6,965 individuals meeting with the diagnosis of AD and 13,232  
198 controls (**Table 1**). Prior to analysis, 570 individuals (91 cases and 479 controls) were removed  
199 due to known or cryptic relatedness. For ultra-rare variant analysis (MAF of 0.01% or lower),  
200 conventional population stratification has not been a strong confounder as it can be in common  
201 variant analyses; and these results did not significantly differ from meta-analyses in population  
202 stratified data. All variants reported here were found in five or less individuals from the study,  
203 and most variants were found in only one person, increasing the confidence that population  
204 stratification was not an issue. An important distinction exists between the cases and controls in  
205 the ADSP and WHICAP datasets. In the ADSP dataset, the younger cases were preferentially  
206 chosen as part of the study design<sup>7</sup>. The WHICAP individuals are part of a population-based  
207 cohort followed longitudinally, and thus cases were older than controls.

208

209 Of the 18,834 genes analyzed, 15,736 contained at least one qualifying variant. Genomic  
210 inflation for the analysis was very modest,  $\lambda = 1.04$  (**Figure 1**). Gene-based, collapsing analyses  
211 for loss-of-function variants, with allele frequency less than 0.01% (within the study cohort, and  
212 separately within ExAC<sup>12</sup>) identified *SORL1* to be enriched in cases compared to controls at an  
213 exome-wide significance level of  $p = 2.17 \times 10^{-8}$  (**Table 2**). We confirmed the results for *SORL1*  
214 were not driven by a particular ethnicity by running individual association tests on non-Hispanic  
215 Whites, Caribbean Hispanics, and African Americans as described above, separately and  
216 summarizing them in a sample weight meta-analysis<sup>14</sup> (*SORL1*  $p = 2.45 \times 10^{-8}$ ). Although no  
217 other gene attained the study-wide level of statistical significance, *GRID2IP* ( $p = 2.98 \times 10^{-4}$ ),  
218 *WDR76* ( $p = 7.39 \times 10^{-4}$ ) and *GRN* ( $p = 9.56 \times 10^{-4}$ ) were highly-ranked candidate genes that  
219 were case-enriched for loss-of-function variants (**Table 2**). Extended results are found in  
220 **Supplemental Table 2**. There were no significant differences in synonymous variation in these  
221 four genes (1.5% cases, 1.7% of controls; FET  $p = 0.25$ ).

222  
223 There were 19 cases with a loss-of-function qualifying variant in *SORL1* (**Table 3**) among 6,965  
224 cases (frequency = 0.27%) and one variant among 13,232 controls (frequency = 0.0076%).  
225 Given the rate of *SORL1* loss-of-function qualifying variants found in our control sample (1 /  
226 13,232; frequency = 0.0076%), we expected to identify only 0.5 loss-of-function variants by  
227 chance among our 6,965 cases; however, we identified 19. The accompanying odds ratio for  
228 AD risk upon identifying a *SORL1* loss-of-function qualifying variants as defined in this study  
229 was 36 [95% CI 5.8 – 1493.0]. Targeted investigation into the single control indicated a  
230 diagnosis of mild cognitive impairment<sup>15</sup>. The *SORL1* loss-of-function variants were found  
231 across the non-Hispanic white, Caribbean Hispanic, and African American cases. Six of the 19  
232 cases were deceased with autopsy confirmation of the AD diagnosis<sup>16</sup>.

233

234 Of relevance to loss-of-function variant case-enrichment, *SORL1* is known to be among the  
235 protein-coding genes most significantly depleted of loss-of-function variants in the general  
236 population (LOF depletion FDR =  $2 \times 10^{-7}$ ) (**Table 2**). Of the 17 distinct *SORL1* loss-of-function  
237 qualifying variants, only one (11:121440980, rs200504189) was found in the ExAC database<sup>12</sup>.  
238 *SORL1* was also significantly enriched for functional variants (nonsynonymous and predicted as  
239 possibly or probably damaging by PolyPhen-2 HumVar<sup>17</sup>) ( $p = 9.79 \times 10^{-7}$ ), 1.8% of cases had a  
240 qualifying functional variant compared to 1% controls. There was no difference in the frequency  
241 of *APOE-ε4* carriers among cases with qualifying variants in *SORL1* compared to those without  
242 these variants (40.0% vs. 39.6%). Age-at-onset analyses revealed a 6.81 year difference  
243 between cases with a *SORL1* qualifying variant versus non-carrying cases (AD carriers: 69.86  
244 +/- 9.37; AD non-carriers: 76.67 +/- 8.53;  $t(6963)$ ,  $p = 4 \times 10^{-4}$ ).

245  
246 Coverage for the 12 qualifying *GRID2IP* variants was lower in the sequencing performed in this  
247 project and in ExAC<sup>12</sup>, reducing our confidence of the rare variant calling for this gene because  
248 it is likely not represented well by exome capture libraries. The median of mean read-depth  
249 coverage of the *GRID2IP* variants was 21-fold and at these exact same sites in ExAC<sup>12</sup>, 4-fold.  
250 However, read-depth coverage was higher in the genome aggregation database (gnomAD),  
251 with a median of mean read-depth coverage of 21-fold, and only two loss-of-function variants  
252 less than the 0.0001 allele frequency threshold. Two of the 11 cases were deceased with  
253 autopsy confirming the pathological diagnosis of AD<sup>16</sup>.

254  
255 Coverage for *WDR76* and *GRN* were excellent in this study and in ExAC<sup>12</sup>. Three of the 10  
256 individuals clinically diagnosed as AD with loss-of-function qualifying variants in *WDR76* had  
257 undergone autopsy. One met postmortem criteria defined as high likelihood of Alzheimer's  
258 disease, a second met intermediate likelihood<sup>16</sup>, however, the third had no distinctive pathology  
259 and no definitive diagnosis was derived. Two of the 11 individuals with *GRN* loss-of-function

260 qualifying variants had autopsy data; one met criteria for AD and the other for frontotemporal  
261 lobar degeneration (FTLD) <sup>18</sup>. None of the GRN carriers carried variants in any of the top four  
262 genes.

263 We also investigated rare variants in loci that were associated with AD in the IGAP genome  
264 wide association study <sup>13</sup> along with *APP*, *PSEN1*, *PSEN2*, and *TREM2*. (**Table 4**). Qualifying  
265 variants in *SORL1* and *ZCWPW1* (p=0.02) were more frequent in cases than controls. Overall,  
266 there was a slight increase in the frequency of variants in cases compared with controls  
267 (Fisher's exact p=0.002), but after the removal of *SORL1*, the association was no longer  
268 significant (Fisher's exact p=0.11).

## 269 **Discussion**

270 This study provides strong evidence that ultra-rare, loss-of-function variants in *SORL1* represent  
271 an important genetic risk factor for AD. This is the first investigation to establish a genome-wide  
272 statistically significant association between ultra-rare variants in *SORL1* and AD in a large,  
273 unbiased whole-exome study of unrelated early- and late-onset cases and controls. *SORL1* has  
274 previously been implicated in both familial and sporadic, early- and late-onset Alzheimer's  
275 disease <sup>19-25</sup>.

276 Common variants in *SORL1* were first genetically associated with AD in a candidate gene  
277 analysis using 29 common variants <sup>24</sup>. Shortly thereafter, nine rare loss-of-function variants  
278 including nonsense, frameshift and splice site mutations were described in familial and sporadic  
279 early onset AD <sup>19, 20</sup>. The *SORL1* findings in early onset AD were replicated in larger European  
280 cohorts of patients<sup>21</sup>. Using a targeted, candidate gene approach, *SORL1* variants were found  
281 by us in familial and sporadic late-onset AD among Caribbean Hispanics as well as patients with  
282 European ancestry with sporadic late-onset AD <sup>26</sup>. Our findings here indicated that cases who  
283 possess a *SORL1* qualifying variant were on average younger at onset. Yet, only four of the

284 cases with a *SORL1* qualifying variant were diagnosed before the age of 65, implicating that the  
285 gene is involved in both early- and late-onset AD.

286 Holstege, et al.<sup>23</sup>, reported that strongly damaging, but rare variants (ExAC<sup>12</sup> MAF < 1x10<sup>-5</sup>) in  
287 *SORL1* as defined by a Combined Annotation Dependent Depletion (CADD) score of greater  
288 than 30, increased the risk of Alzheimer's disease by 12-fold. The authors proposed that the  
289 presence of these variants should be considered in addition to risk variants in *APOE*, and  
290 causal variants in *PSEN1*, *PSEN2* or *APP* for assessing risk in a clinical setting. Accordingly,  
291 only one of the *SORL1* variants identified in our study was found in ExAC<sup>12</sup>, and was very rare  
292 (11:121440980; ExAC AF = 4.95x10<sup>-5</sup>). Furthermore, half of the 10 variants with a CADD score  
293 available were over 30, and all were over 25. The depletion of loss-of-function variants in the  
294 ExAC database lends further evidence to the significance of the higher frequency of loss-of-  
295 function variants in our AD sample.

296  
297 *SORL1*, also known as *SORLA* and *LR11*, encodes a trafficking protein (sortilin-related  
298 receptor, L(DLR class) A repeats containing protein) that binds the amyloid precursor protein  
299 (APP) redirecting it to a non-amyloidogenic pathway within the retromer complex. The major site  
300 for expression of *SORL1* protein is in the brain especially within neurons and astrocytes. A $\beta$   
301 peptides are also directed to the lysosome by *SORL1*. Processing of APP requires endocytosis  
302 of molecules from the cell surface to endosomes whereby proteolytic breakdown to A $\beta$  occurs.  
303 *SORL1* acts as a sorting receptor for APP that recycles molecules from endosomes back to the  
304 trans-Golgi network to decrease A $\beta$  production. We found that in the absence of the *SORL1*  
305 gene, APP was released into the late endosome where it underwent  $\beta$ -secretase and  $\gamma$ -  
306 secretase cleavage generating A $\beta$ <sup>24</sup>. Thus, the mechanisms by which mutations in *SORL1* lead  
307 to neurodegeneration in Alzheimer's disease relates to the disruption of its ability to bind APP.

308 Qualifying variants in other genes were also more prevalent among patients with AD compared  
309 with healthy, non-demented controls. Variants in *GRID2IP*, *WDR76* and *GRN* were four to five  
310 times more frequent in cases than in controls, though these genes have not yet achieved  
311 genome-wide significance and thus further studies including larger patient samples will help  
312 determine which contribute to AD risk.

313 Glutamate receptor delta-2 interacting protein (*GRID2IP*) is selectively expressed in the  
314 cerebellar Purkinje cell-fiber synapses. The exact role for this gene is not fully understood, but it  
315 appears to be a postsynaptic scaffold protein that links to GRID2 with signaling molecules and  
316 the actin cytoskeleton<sup>27</sup>. There is no known role for *GRID2IP* in AD despite the fact that  
317 mutations were found in two individuals with postmortem confirmed Alzheimer's disease. The  
318 gene has not been well represented in existing exome sequencing libraries and the resulting  
319 reduced coverage of this gene makes the findings more difficult to interpret. However, the  
320 variants driving the signal in our analyses are all well covered in our entire cohort, with more  
321 than 96% of samples achieving at least 10X coverage.

322 *WDR76* interacts with chromatin components and the cytosolic chaperonin containing TCP-1  
323 (CCT), allowing for the maintenance of cellular homeostasis by assisting in the identification of  
324 folded proteins. *WDR76* has low expression in brain and relatively high expression in lymph  
325 nodes. Only one of the three individuals with postmortem data met "high likelihood criteria" for  
326 AD.

327 *GRN* mutations in patients with clinically diagnosed AD have been previously reported in large  
328 families in the National Institute on Aging family-based study (NIA-AD)<sup>28</sup> and among large,  
329 multiply affected families of Caribbean Hispanic ancestry<sup>29</sup>. These loss-of-function mutations  
330 result in haploinsufficiency, premature stop codons or nonsense variants impairing the secretion  
331 or the structure of Progranulin, involved intracellular trafficking and lysosomal biogenesis and

332 function. Its role in AD is unclear and possibly coincidental<sup>30</sup>. The phenotype of FTLD includes  
333 unique manifestations allowing it to be distinguished from AD. A family presumed to have  
334 Alzheimer's disease phenotypically with a *GRN* mutation (c.154delA) had FTLD with ubiquitin-  
335 positive, tau-negative and lentiform neuronal intranuclear inclusions (-U NII) with neuronal loss  
336 and gliosis affecting the frontal and temporal lobes, and TDP43 inclusions<sup>31</sup>. Only one of the six  
337 family members (Patient II:1) had mixed pathology meeting NIA-Reagan criteria of high  
338 likelihood<sup>16</sup> and coexisting FTLD-U N11 with TDP43 inclusions. *GRN* mutations were also  
339 observed in a sporadic patient with postmortem evidence of Alzheimer's disease: NIA-Reagan  
340 criteria of high likelihood<sup>16</sup> and coexisting FTLD-U N11 with TDP43 inclusions<sup>32</sup>. Among the  
341 patients with *GRN* mutations in this study, one patient met criteria for definite Alzheimer's  
342 disease without co-existing FTLD, while another met pathological criteria for FTLD.

343 The results here indicate that extremely rare, loss-of-function variants in *SORL1* have an  
344 strongly effect the risk of sporadic AD. While qualifying variants were present in only 0.27% of  
345 patients, only a single variant was found among 13,232 controls, and the single control carrier  
346 upon a post hoc cognitive evaluation was identified to have a diagnosis of mild cognitive  
347 impairment. These results confirm and greatly extend those from sequencing studies in familial  
348 and sporadic early onset Alzheimer's disease<sup>19-21</sup>, familial AD families<sup>24, 26, 33</sup> and investigations  
349 within clinical settings. The resulting impact of the loss-of-function variants in *SORL1* on  
350 recycling of the amyloid precursor protein and the amyloid  $\beta$  protein make this pathway an  
351 attractive target for the development of therapies. Beyond implicating *SORL1* and highly  
352 suggestive candidate genes for AD, this study shows for the first time that the collapsing  
353 analysis methodology of ultra-rare variants described here that has proven successful for a  
354 number of rare diseases also can securely implicate genes in a condition as common as AD.

355



356 **Author Contributions**

357 Study Design:

358 NSR, CW, SK, SP, GT, BNV, DBG, RM

359 Data Collection:

360 AMB, HA, JJM, NS, RL, CW, SK, SP, GT, BNV, DBG, RM

361 Data Analysis:

362 NSR, CW, SK, SP, GT, BNV, DBG, RM

363 Writing and Editing:

364 NSR, AMB, HA, JJM, NS, RL, CW, SK, SP, GT, BNV, DBG, RM

365 **Acknowledgements**

366 WHICAP and EFIGA

367 Data collection for this project was supported by the Washington Heights and Inwood

368 Community Aging Project (WHICAP) and Genetic Studies of Alzheimer's disease in Caribbean

369 Hispanics (Estudio familiar de la genética de la enfermedad de Alzheimer, also known as

370 EFIGA) funded by the National Institute on Aging (NIA), by the National Institutes of Health

371 (NIH) (1RF1AG054023, 5R37AG015473, RF1AG015473, R56AG051876), and the National

372 Center for Advancing Translational Sciences, NIH through Grant Number TL1TR001875. We

373 acknowledge the WHICAP and EFIGA study participants and the research and support staff for

374 their contributions to this study.

375 ADSP

376 The Alzheimer's Disease Sequencing Project (ADSP) is comprised of two Alzheimer's Disease

377 (AD) genetics consortia and three National Human Genome Research Institute (NHGRI) funded

378 Large Scale Sequencing and Analysis Centers (LSAC). The two AD genetics consortia are the

379 Alzheimer's Disease Genetics Consortium (ADGC) funded by NIA (U01 AG032984), and the

380 Cohorts for Heart and Aging Research in Genomic Epidemiology (CHARGE) funded by NIA  
381 (R01 AG033193), the National Heart, Lung, and Blood Institute (NHLBI), other National Institute  
382 of Health (NIH) institutes and other foreign governmental and non-governmental organizations.  
383 The Discovery Phase analysis of sequence data is supported through UF1AG047133 (to Drs.  
384 Schellenberg, Farrer, Pericak-Vance, Mayeux, and Haines); U01AG049505 to Dr. Seshadri;  
385 U01AG049506 to Dr. Boerwinkle; U01AG049507 to Dr. Wijsman; and U01AG049508 to Dr.  
386 Goate and the Discovery Extension Phase analysis is supported through U01AG052411 to Dr.  
387 Goate and U01AG052410 to Dr. Pericak-Vance. Data generation and harmonization in the  
388 Follow-up Phases is supported by U54AG052427 (to Drs. Schellenberg and Wang).

389 The ADGC cohorts include: Adult Changes in Thought (ACT), the Alzheimer's Disease Centers  
390 (ADC), the Chicago Health and Aging Project (CHAP), the Memory and Aging Project (MAP),  
391 Mayo Clinic (MAYO), Mayo Parkinson's Disease controls, University of Miami, the Multi-  
392 Institutional Research in Alzheimer's Genetic Epidemiology Study (MIRAGE), the National Cell  
393 Repository for Alzheimer's Disease (NCRAD), the National Institute on Aging Late Onset  
394 Alzheimer's Disease Family Study (NIA-AD; U24 AG056270), the Religious Orders Study  
395 (ROS), the Texas Alzheimer's Research and Care Consortium (TARC), Vanderbilt  
396 University/Case Western Reserve University (VAN/CWRU), the Washington Heights-Inwood  
397 Columbia Aging Project (WHICAP) and the Washington University Sequencing Project (WUSP),  
398 the Columbia University Hispanic- Estudio Familiar de Influencia Genetica de Alzheimer  
399 (EFIGA), the University of Toronto (UT), and Genetic Differences (GD).

400

401 The CHARGE cohorts, with funding provided by 5RC2HL102419 and HL105756, include the  
402 following: Atherosclerosis Risk in Communities (ARIC) Study which is carried out as a  
403 collaborative study supported by NHLBI contracts (HHSN268201100005C,  
404 HHSN268201100006C, HHSN268201100007C, HHSN268201100008C,

405 HHSN268201100009C, HHSN268201100010C, HHSN268201100011C, and  
406 HHSN268201100012C), Austrian Stroke Prevention Study (ASPS), Cardiovascular Health  
407 Study (CHS), Erasmus Rucphen Family Study (ERF), Framingham Heart Study (FHS), and  
408 Rotterdam Study (RS). CHS research was supported by contracts HHSN268201200036C,  
409 HHSN268200800007C, N01HC55222, N01HC85079, N01HC85080, N01HC85081,  
410 N01HC85082, N01HC85083, N01HC85086, and grants U01HL080295 and U01HL130114 from  
411 the National Heart, Lung, and Blood Institute (NHLBI), with additional contribution from the  
412 National Institute of Neurological Disorders and Stroke (NINDS). Additional support was  
413 provided by R01AG023629, R01AG15928, and R01AG20098 from the National Institute on  
414 Aging (NIA). A full list of principal CHS investigators and institutions can be found at CHS-  
415 NHLBI.org. The content is solely the responsibility of the authors and does not necessarily  
416 represent the official views of the National Institutes of Health.

417 The three LSACs are: the Human Genome Sequencing Center at the Baylor College of  
418 Medicine (U54 HG003273), the Broad Institute Genome Center (U54HG003067), and the  
419 Washington University Genome Institute (U54HG003079).

420

421 Biological samples and associated phenotypic data used in primary data analyses were stored  
422 at Study Investigators institutions, and at the National Cell Repository for Alzheimer's Disease  
423 (NCRAD, U24AG021886) at Indiana University funded by NIA. Associated Phenotypic Data  
424 used in primary and secondary data analyses were provided by Study Investigators, the NIA  
425 funded Alzheimer's Disease Centers (ADCs), and the National Alzheimer's Coordinating Center  
426 (NACC, U01AG016976) and the National Institute on Aging Genetics of Alzheimer's Disease  
427 Data Storage Site (NIAGADS, U24AG041689) at the University of Pennsylvania, funded by NIA,  
428 and at the Database for Genotypes and Phenotypes (dbGaP) funded by NIH. This research was  
429 supported in part by the Intramural Research Program of the National Institutes of health,  
430 National Library of Medicine. Contributors to the Genetic Analysis Data included Study

431 Investigators on projects that were individually funded by NIA, and other NIH institutes, and by  
432 private U.S. organizations, or foreign governmental or nongovernmental organizations.

433

434 We would like to acknowledge the following individuals or groups for the contributions of control  
435 samples: T. Young; K. Whisenhunt; S. Palmer; S. Berkovic, I. Scheffer, B. Grinton; E. Cirulli; M.  
436 Winn; R.Gbadegesin; A. Poduri; S. Schuman; E. Nading; E. Pras; D. Lancet; Z. Farfel; S.  
437 Kerns; H. Oster; D. Valle; J. Hoover-Fong; N. Sobriera; M. Hauser; G. Nestadt; J. Samuels; Y.  
438 Wang; G. Cavalleri, N. Delanty; C. Depondt; S. Sisodiya; R. Buckley; C. Moylan; A. M. Diehl;  
439 M. Abdelmalek; S. Delaney; V. Shashi; M. Walker; M. Sum; the ALS Sequencing Consortium;  
440 the Washington University Neuromuscular Genetics Project; DUHS (Duke University Health  
441 System) Nonalcoholic Fatty Liver Disease Research Database and Specimen Repository;  
442 Epilepsy Genetics Initiative, A Signature Program of CURE; the Epi4K Consortium and Epilepsy  
443 Phenome/Genome Project; the Undiagnosed Diseases Network; and the Utah Foundation for  
444 Biomedical Research.

445 The collection of control samples and data was funded in part by: Biogen; Gilead Sciences, Inc.;;  
446 UCB; National Institutes of Health (RO1HD048805); National Institute of Neurological Disorders  
447 and Stroke (U01NS077303, U01NS053998, U54NS078059); National Institute of Child Health  
448 and Human Development (P01HD080642); National Institute of Mental Health (R01MH097971,  
449 K01MH098126); National Human Genome Research Institute (U01HG007672); an American  
450 Academy of Child and Adolescent Psychiatry (AACAP) Pilot Research Award; Endocrine  
451 Fellows Foundation Grant; the NIH Clinical and Translational Science Award Program  
452 (UL1TR000040); the Ellison Medical Foundation New Scholar award AG-NS-0441-08; Duke  
453 Chancellor's Discovery Program Research Fund 2014; The J. Willard and Alice S. Marriott  
454 Foundation; The Muscular Dystrophy Association; The Nicholas Nunno Foundation; The JDM  
455 Fund for Mitochondrial Research; The Arturo Estopinan TK2 Research Fund; the Stanley

456 Institute for Cognitive Genomics at Cold Spring Harbor Laboratory; New York-Presbyterian  
457 Hospital; the Columbia University College of Physicians and Surgeons; and the Columbia  
458 University Medical Center.

459 The content is solely the responsibility of the authors and does not necessarily represent the  
460 official views of the National Institutes of Health.

461

462 Biogen Inc. provided support for whole exome sequencing for the WHICAP cohort through a  
463 grant to David Goldstein, PhD and salary support for Neha S. Raghavan PhD for analyses.

464 Individuals at Biogen were not involved in the collection of data, analysis or interpretation of the  
465 genetic data, nor in the production of this manuscript.

466 **Declaration of interests**

467 SP is a paid employee of and holds stock in AstraZeneca. All other authors have no interests to  
468 declare.

469

470

471

## 472 References

- 473 1. Consortium UK, Walter K, Min JL, et al. The UK10K project identifies rare variants in  
474 health and disease. *Nature*. 2015 Oct 1;526(7571):82-90.
- 475 2. Keinan A, Clark AG. Recent explosive human population growth has resulted in an  
476 excess of rare genetic variants. *Science*. 2012 May 11;336(6082):740-3.
- 477 3. Park JH, Gail MH, Weinberg CR, et al. Distribution of allele frequencies and effect sizes  
478 and their interrelationships for common genetic susceptibility variants. *Proc Natl Acad Sci U S*  
479 *A*. 2011 Nov 1;108(44):18026-31.
- 480 4. Auer PL, Lettre G. Rare variant association studies: considerations, challenges and  
481 opportunities. *Genome Med*. 2015;7(1):16.
- 482 5. Cirulli ET, Lasseigne BN, Petrovski S, et al. Exome sequencing in amyotrophic lateral  
483 sclerosis identifies risk genes and pathways. *Science*. 2015 Mar 27;347(6229):1436-41.
- 484 6. Epi Kc, Epilepsy Phenome/Genome P. Ultra-rare genetic variation in common epilepsies:  
485 a case-control sequencing study. *Lancet Neurol*. 2017 Feb;16(2):135-43.
- 486 7. Beecham GW, Bis JC, Martin ER, et al. The Alzheimer's Disease Sequencing Project:  
487 Study design and sample selection. *Neurol Genet*. 2017 Oct;3(5):e194.
- 488 8. McKhann G, Drachman D, Folstein M, Katzman R, Price D, Stadlan EM. Clinical  
489 diagnosis of Alzheimer's disease: report of the NINCDS-ADRDA Work Group under the  
490 auspices of Department of Health and Human Services Task Force on Alzheimer's Disease.  
491 *Neurology*. 1984 Jul;34(7):939-44.
- 492 9. Kawas C, Segal J, Stewart WF, Corrada M, Thal LJ. A validation study of the Dementia  
493 Questionnaire. *Arch Neurol*. 1994 Sep;51(9):901-6.
- 494 10. Brandt JS, M.; Folstein, M. The telephone interview for cognitive status. *Neuropsychiatry*  
495 *Neuropsychol Behav Neurol* July 1988;1(2):111-7.
- 496 11. Farrell CM, O'Leary NA, Harte RA, et al. Current status and new features of the  
497 Consensus Coding Sequence database. *Nucleic acids research*. 2014 Jan;42(Database  
498 issue):D865-72.
- 499 12. Lek M, Karczewski KJ, Minikel EV, et al. Analysis of protein-coding genetic variation in  
500 60,706 humans. *Nature*. 2016 Aug 18;536(7616):285-91.
- 501 13. Lambert JC, Ibrahim-Verbaas CA, Harold D, et al. Meta-analysis of 74,046 individuals  
502 identifies 11 new susceptibility loci for Alzheimer's disease. *Nat Genet*. 2013 Dec;45(12):1452-  
503 8.
- 504 14. Willer CJ, Li Y, Abecasis GR. METAL: fast and efficient meta-analysis of genomewide  
505 association scans. *Bioinformatics*. 2010 Sep 1;26(17):2190-1.
- 506 15. Albert MS, DeKosky ST, Dickson D, et al. The diagnosis of mild cognitive impairment  
507 due to Alzheimer's disease: recommendations from the National Institute on Aging-Alzheimer's  
508 Association workgroups on diagnostic guidelines for Alzheimer's disease. *Alzheimers Dement*.  
509 2011 May;7(3):270-9.
- 510 16. Newell KL, Hyman BT, Growdon JH, Hedley-Whyte ET. Application of the National  
511 Institute on Aging (NIA)-Reagan Institute criteria for the neuropathological diagnosis of  
512 Alzheimer disease. *J Neuropathol Exp Neurol*. 1999 Nov;58(11):1147-55.
- 513 17. Adzhubei IA, Schmidt S, Peshkin L, et al. A method and server for predicting damaging  
514 missense mutations. *Nat Methods*. 2010 Apr;7(4):248-9.

- 515 18. Cairns NJ, Bigio EH, Mackenzie IR, et al. Neuropathologic diagnostic and nosologic  
516 criteria for frontotemporal lobar degeneration: consensus of the Consortium for Frontotemporal  
517 Lobar Degeneration. *Acta Neuropathol.* 2007 Jul;114(1):5-22.
- 518 19. Pottier C, Hannequin D, Coutant S, et al. High frequency of potentially pathogenic  
519 SORL1 mutations in autosomal dominant early-onset Alzheimer disease. *Mol Psychiatr.* 2012  
520 Sep;17(9):875-9.
- 521 20. Nicolas G, Charbonnier C, Wallon D, et al. SORL1 rare variants: a major risk factor for  
522 familial early-onset Alzheimer's disease. *Mol Psychiatry.* 2016 Jun;21(6):831-6.
- 523 21. Verheijen J, Van den Bossche T, van der Zee J, et al. A comprehensive study of the  
524 genetic impact of rare variants in SORL1 in European early-onset Alzheimer's disease. *Acta*  
525 *Neuropathol.* 2016 Aug;132(2):213-24.
- 526 22. Cuccaro ML, Carney RM, Zhang Y, et al. SORL1 mutations in early- and late-onset  
527 Alzheimer disease. *Neurol Genet.* 2016 Dec;2(6):e116.
- 528 23. Holstege H, van der Lee SJ, Hulsman M, et al. Characterization of pathogenic SORL1  
529 genetic variants for association with Alzheimer's disease: a clinical interpretation strategy.  
530 *European journal of human genetics : EJHG.* 2017 Aug;25(8):973-81.
- 531 24. Rogaeva E, Meng Y, Lee JH, et al. The neuronal sortilin-related receptor SORL1 is  
532 genetically associated with Alzheimer disease. *Nat Genet.* 2007 Feb;39(2):168-77.
- 533 25. Bellenguez C, Charbonnier C, Grenier-Boley B, et al. Contribution to Alzheimer's  
534 disease risk of rare variants in TREM2, SORL1, and ABCA7 in 1779 cases and 1273 controls.  
535 *Neurobiol Aging.* 2017 Nov;59:220 e1- e9.
- 536 26. Vardarajan BN, Zhang Y, Lee JH, et al. Coding mutations in SORL1 and Alzheimer  
537 disease. *Ann Neurol.* 2015 Feb;77(2):215-27.
- 538 27. Sonoda T, Mochizuki C, Yamashita T, et al. Binding of glutamate receptor delta2 to its  
539 scaffold protein, Delphilin, is regulated by PKA. *Biochem Biophys Res Commun.* 2006 Nov  
540 24;350(3):748-52.
- 541 28. Cruchaga C, Haller G, Chakraverty S, et al. Rare variants in APP, PSEN1 and PSEN2  
542 increase risk for AD in late-onset Alzheimer's disease families. *PLoS One.* 2012;7(2):e31039.
- 543 29. Lee JH, Kahn A, Cheng R, et al. Disease-related mutations among Caribbean Hispanics  
544 with familial dementia. *Mol Genet Genomic Med.* 2014 Sep;2(5):430-7.
- 545 30. Kao AW, McKay A, Singh PP, Brunet A, Huang EJ. Progranulin, lysosomal regulation  
546 and neurodegenerative disease. *Nat Rev Neurosci.* 2017 Jun;18(6):325-33.
- 547 31. Kelley BJ, Haidar W, Boeve BF, et al. Alzheimer disease-like phenotype associated with  
548 the c.154delA mutation in progranulin. *Arch Neurol.* 2010 Feb;67(2):171-7.
- 549 32. Perry DC, Lehmann M, Yokoyama JS, et al. Progranulin mutations as risk factors for  
550 Alzheimer disease. *JAMA Neurol.* 2013 Jun;70(6):774-8.
- 551 33. Lee JH, Cheng R, Schupf N, et al. The association between genetic variants in SORL1  
552 and Alzheimer disease in an urban, multiethnic, community-based cohort. *Arch Neurol.* 2007  
553 Apr;64(4):501-6.

554

555

556 **Figure Legend**

557

558 Figure 1. QQ Plot: Observed vs. expected p-values. Lambda = 1.04173

559



560

**Table 1. Characteristics of Study Cohort (n=20,197)**

|                     | AD Cases        |          | Controls        |            |          |
|---------------------|-----------------|----------|-----------------|------------|----------|
|                     | WHICAP          | ADSP     | WHICAP          | ADSP       | External |
| N                   | 1371            | 5594     | 2331            | 4506       | 6395     |
| <b>Combined</b>     | <b>6965</b>     |          | <b>13,232</b>   |            |          |
| Age (mean ± SD)     | 81.4±6.2        | 75.4±8.4 | 78.1±6.8        | 86.07±4.53 | N/A      |
| <b>Combined</b>     | <b>76.7±8.5</b> |          | <b>83.4±6.7</b> |            |          |
| Sex (%F)            | 68.5            | 57.2     | 67.6            | 41.1       | 47.3     |
| <b>Combined</b>     | <b>59.4</b>     |          | <b>45.2</b>     |            |          |
| APOE E4 (% Carrier) | 27.43           | 42.40    | 20.94           | 15.14      | N/A      |
| <b>Combined</b>     | <b>39.50</b>    |          | <b>17.10</b>    |            |          |

*Mean age and APOE E4 carrier % do not include the External controls;*

*Age for cases indicates age at diagnosis, and for controls the age at last assessment or age when last known to be free of dementia*

561

562

563

**Table 2. Variant counts for the top four AD genes**

| Gene Name      | Total Variant | Total SNV | Total Indel | No. of      |                | No. of      |                   | Enriched Direction | Fet P    |
|----------------|---------------|-----------|-------------|-------------|----------------|-------------|-------------------|--------------------|----------|
|                |               |           |             | Cases w/ QV | Case Frequency | Cntrl w/ QV | Control Frequency |                    |          |
| <b>SORL1</b>   | 17            | 10        | 7           | 19          | 0.0027         | 1           | 7.56E-05          | case               | 2.17E-08 |
| <b>GRID2IP</b> | 12            | 5         | 8           | 11          | 0.0016         | 2           | 1.51E-04          | case               | 2.98E-04 |
| <b>WDR76</b>   | 10            | 3         | 7           | 10          | 0.0014         | 2           | 1.51E-04          | case               | 7.39E-04 |
| <b>GRN</b>     | 12            | 6         | 6           | 11          | 0.0016         | 3           | 2.27E-04          | case               | 9.56E-04 |

564 *QV= Qualifying variant; FET = Fisher's Exact Test*

565

**Table 3. SORL1 variants**

| Genomic Position                    | Variant Type | Variant Class | CADD score | Protein modification | ExAC Global Frequency | Case/Control | Sex | Ethnicity | Braak Stage | Age at Onset or Last Visit |
|-------------------------------------|--------------|---------------|------------|----------------------|-----------------------|--------------|-----|-----------|-------------|----------------------------|
| 11-121367577                        | snv          | SAV           | 26.6       | NA                   | 0                     | case         | F   | AA        | NA          | 77                         |
| 11-121367654                        | snv          | SG            | 37         | p.Arg279*            | 0                     | case         | F   | NHW       | 6           | 72                         |
| <b>11-12142134322</b> <sup>23</sup> | snv          | SG            | 39         | p.Arg744*            | 0                     | case         | M   | NHW       | NA          | 65                         |
| <b>11-12142134322</b> <sup>23</sup> | snv          | SG            | 39         | p.Arg744*            | 0                     | case         | F   | NHW       | NA          | 67                         |
| 11-121426001                        | indel        | FV            | NA         | p.Asp850fs           | 0                     | case         | F   | NHW       | NA          | 60                         |
| 11-121428047                        | snv          | SG            | 41         | p.Arg866*            | 0                     | case         | M   | NHW       | 6           | 65                         |
| 11-121430263                        | indel        | FV            | NA         | p.Ile983fs           | 0                     | ctrl         | M   | AA        | NA          | 64                         |
| 11-121440980                        | snv          | SDV           | 27.6       | NA                   | 4.95E-05              | case         | F   | CH        | NA          | 80                         |
| 11-121456930                        | snv          | SAV           | 26.8       | NA                   | 0                     | case         | M   | NHW       | NA          | 69                         |
| 11-121456930                        | snv          | SAV           | 26.8       | NA                   | 0                     | case         | M   | NHW       | 6           | 62                         |
| 11-121461788                        | indel        | FV            | NA         | p.Cys1431fs          | 0                     | case         | F   | NHW       | NA          | 61                         |
| <b>11-12146648224</b> <sup>25</sup> | snv          | SDV           | 28         | NA                   | 0                     | case         | F   | NHW       | 3           | 90+                        |
| <b>11-12146648224</b> <sup>25</sup> | snv          | SDV           | 28         | NA                   | 0                     | case         | F   | NHW       | NA          | 90+                        |
| 11-121474911                        | indel        | FV            | NA         | p.Thr1511fs          | 0                     | case         | M   | NHW       | NA          | 60                         |
| 11-121474984                        | snv          | SG            | 35         | p.Cys1534*           | 0                     | case         | F   | NHW       | NA          | 74                         |
| <b>11-12147756824</b> <sup>25</sup> | snv          | SG            | 46         | p.Arg1655*           | 0                     | case         | M   | NHW       | NA          | 69                         |
| 11-121477667                        | snv          | SDV           | 26.9       | NA                   | 0                     | case         | F   | AA        | NA          | 68                         |
| 11-121485637                        | indel        | FV            | NA         | p.Asp1828fs          | 0                     | case         | M   | NHW       | NA          | 75                         |
| 11-121491801                        | indel        | FV            | NA         | p.Lys1975fs          | 0                     | case         | M   | NHW       | 6           | 61                         |
| 11-121500253                        | indel        | FV            | NA         | p.Met2211fs          | 0                     | case         | M   | NHW       | 6           | 62                         |

566

567 Those in bold have previously been identified as indicated by the reference

568 SNV = Single Nucleotide Variant; Indel = Insertion or Deletion

569 CADD = Combined Annotation Dependent Depletion

570 FV = Frameshift Variant; SAV = Splice Acceptor Variant; SDV = Splice Donor Variant; SG = Stop Gained

571 AA = African American; CH = Caribbean Hispanic; NHW = Non-hispanic White

572  
573  
574

**Table 4. Counts of ultra-rare variant in previously identified or implicated AD genes**

| Gene Name             | Cases w/<br>QV | Cases<br>w/o QV | Controls<br>w/ QV | Controls<br>w/o QV | FET<br>p-value |
|-----------------------|----------------|-----------------|-------------------|--------------------|----------------|
| ABCA7                 | 28             | 6937            | 34                | 13198              | 0.08           |
| APOE                  | 0              | 6965            | 2                 | 13230              | 0.55           |
| APP                   | 2              | 6963            | 2                 | 13230              | 0.61           |
| BIN1                  | 1              | 6964            | 2                 | 13230              | 1.00           |
| CASS4                 | 1              | 6964            | 1                 | 13231              | 1.00           |
| CD2AP                 | 0              | 6965            | 6                 | 13226              | 0.10           |
| CELF1                 | 1              | 6964            | 0                 | 13232              | 0.34           |
| CLU                   | 1              | 6964            | 1                 | 13231              | 1.00           |
| CR1                   | 6              | 6959            | 17                | 13215              | 0.65           |
| EPHA1                 | 6              | 6959            | 23                | 13209              | 0.17           |
| FERMT2                | 0              | 6965            | 1                 | 13231              | 1.00           |
| HLA-DRB5              | 9              | 6956            | 12                | 13220              | 0.46           |
| INPP5D                | 1              | 6964            | 1                 | 13231              | 1.00           |
| MEF2C                 | 1              | 6964            | 3                 | 13229              | 1.00           |
| MS4A6A                | 2              | 6963            | 7                 | 13225              | 0.72           |
| NME8                  | 11             | 6954            | 11                | 13221              | 0.18           |
| PICALM                | 1              | 6964            | 3                 | 13229              | 1.00           |
| PSEN1                 | 2              | 6963            | 0                 | 13232              | 0.12           |
| PSEN2                 | 2              | 6963            | 0                 | 13232              | 0.12           |
| PTK2B                 | 6              | 6959            | 10                | 13222              | 0.80           |
| SLC24A4               | 1              | 6964            | 3                 | 13229              | 1.00           |
| SORL1                 | 19             | 6946            | 1                 | 13231              | 2.17E-08       |
| TREM2                 | 4              | 6961            | 4                 | 13228              | 0.46           |
| ZCWPW1                | 9              | 6956            | 5                 | 13227              | 0.02           |
| <b>Total</b>          | <b>114</b>     | <b>6857</b>     | <b>149</b>        | <b>13087</b>       |                |
|                       | Cases          |                 | Controls          |                    |                |
| Total % w/<br>variant | 1.6            |                 | 1.1               |                    |                |
| Total FET p-val       | 0.002          |                 |                   |                    |                |

576  
577  
578  
579

Qualifying loss-of-function variants per gene and combined across the 24 genes; QV = Qualifying variant, FET = Fisher's exact test

# QQ Plot: Observed vs. Expected p-values. Lambda = 1.04173

2.5th percentile of expected p-values  
97.5th percentile of expected p-values

bioRxiv preprint doi: <https://doi.org/10.1101/305631>; this version posted April 20, 2018. The copyright holder for this preprint (which was not certified by peer review) is the author/funder. All rights reserved. No reuse allowed without permission.

SORL1  
P=2.17x10<sup>-8</sup>

GRN  
P=9.56x10<sup>-4</sup>

GRID2IP  
P=2.98x10<sup>-4</sup>

WDR76  
P=7.39x10<sup>-4</sup>

Observed -log<sub>10</sub>(p)

Expected -log<sub>10</sub>(p)

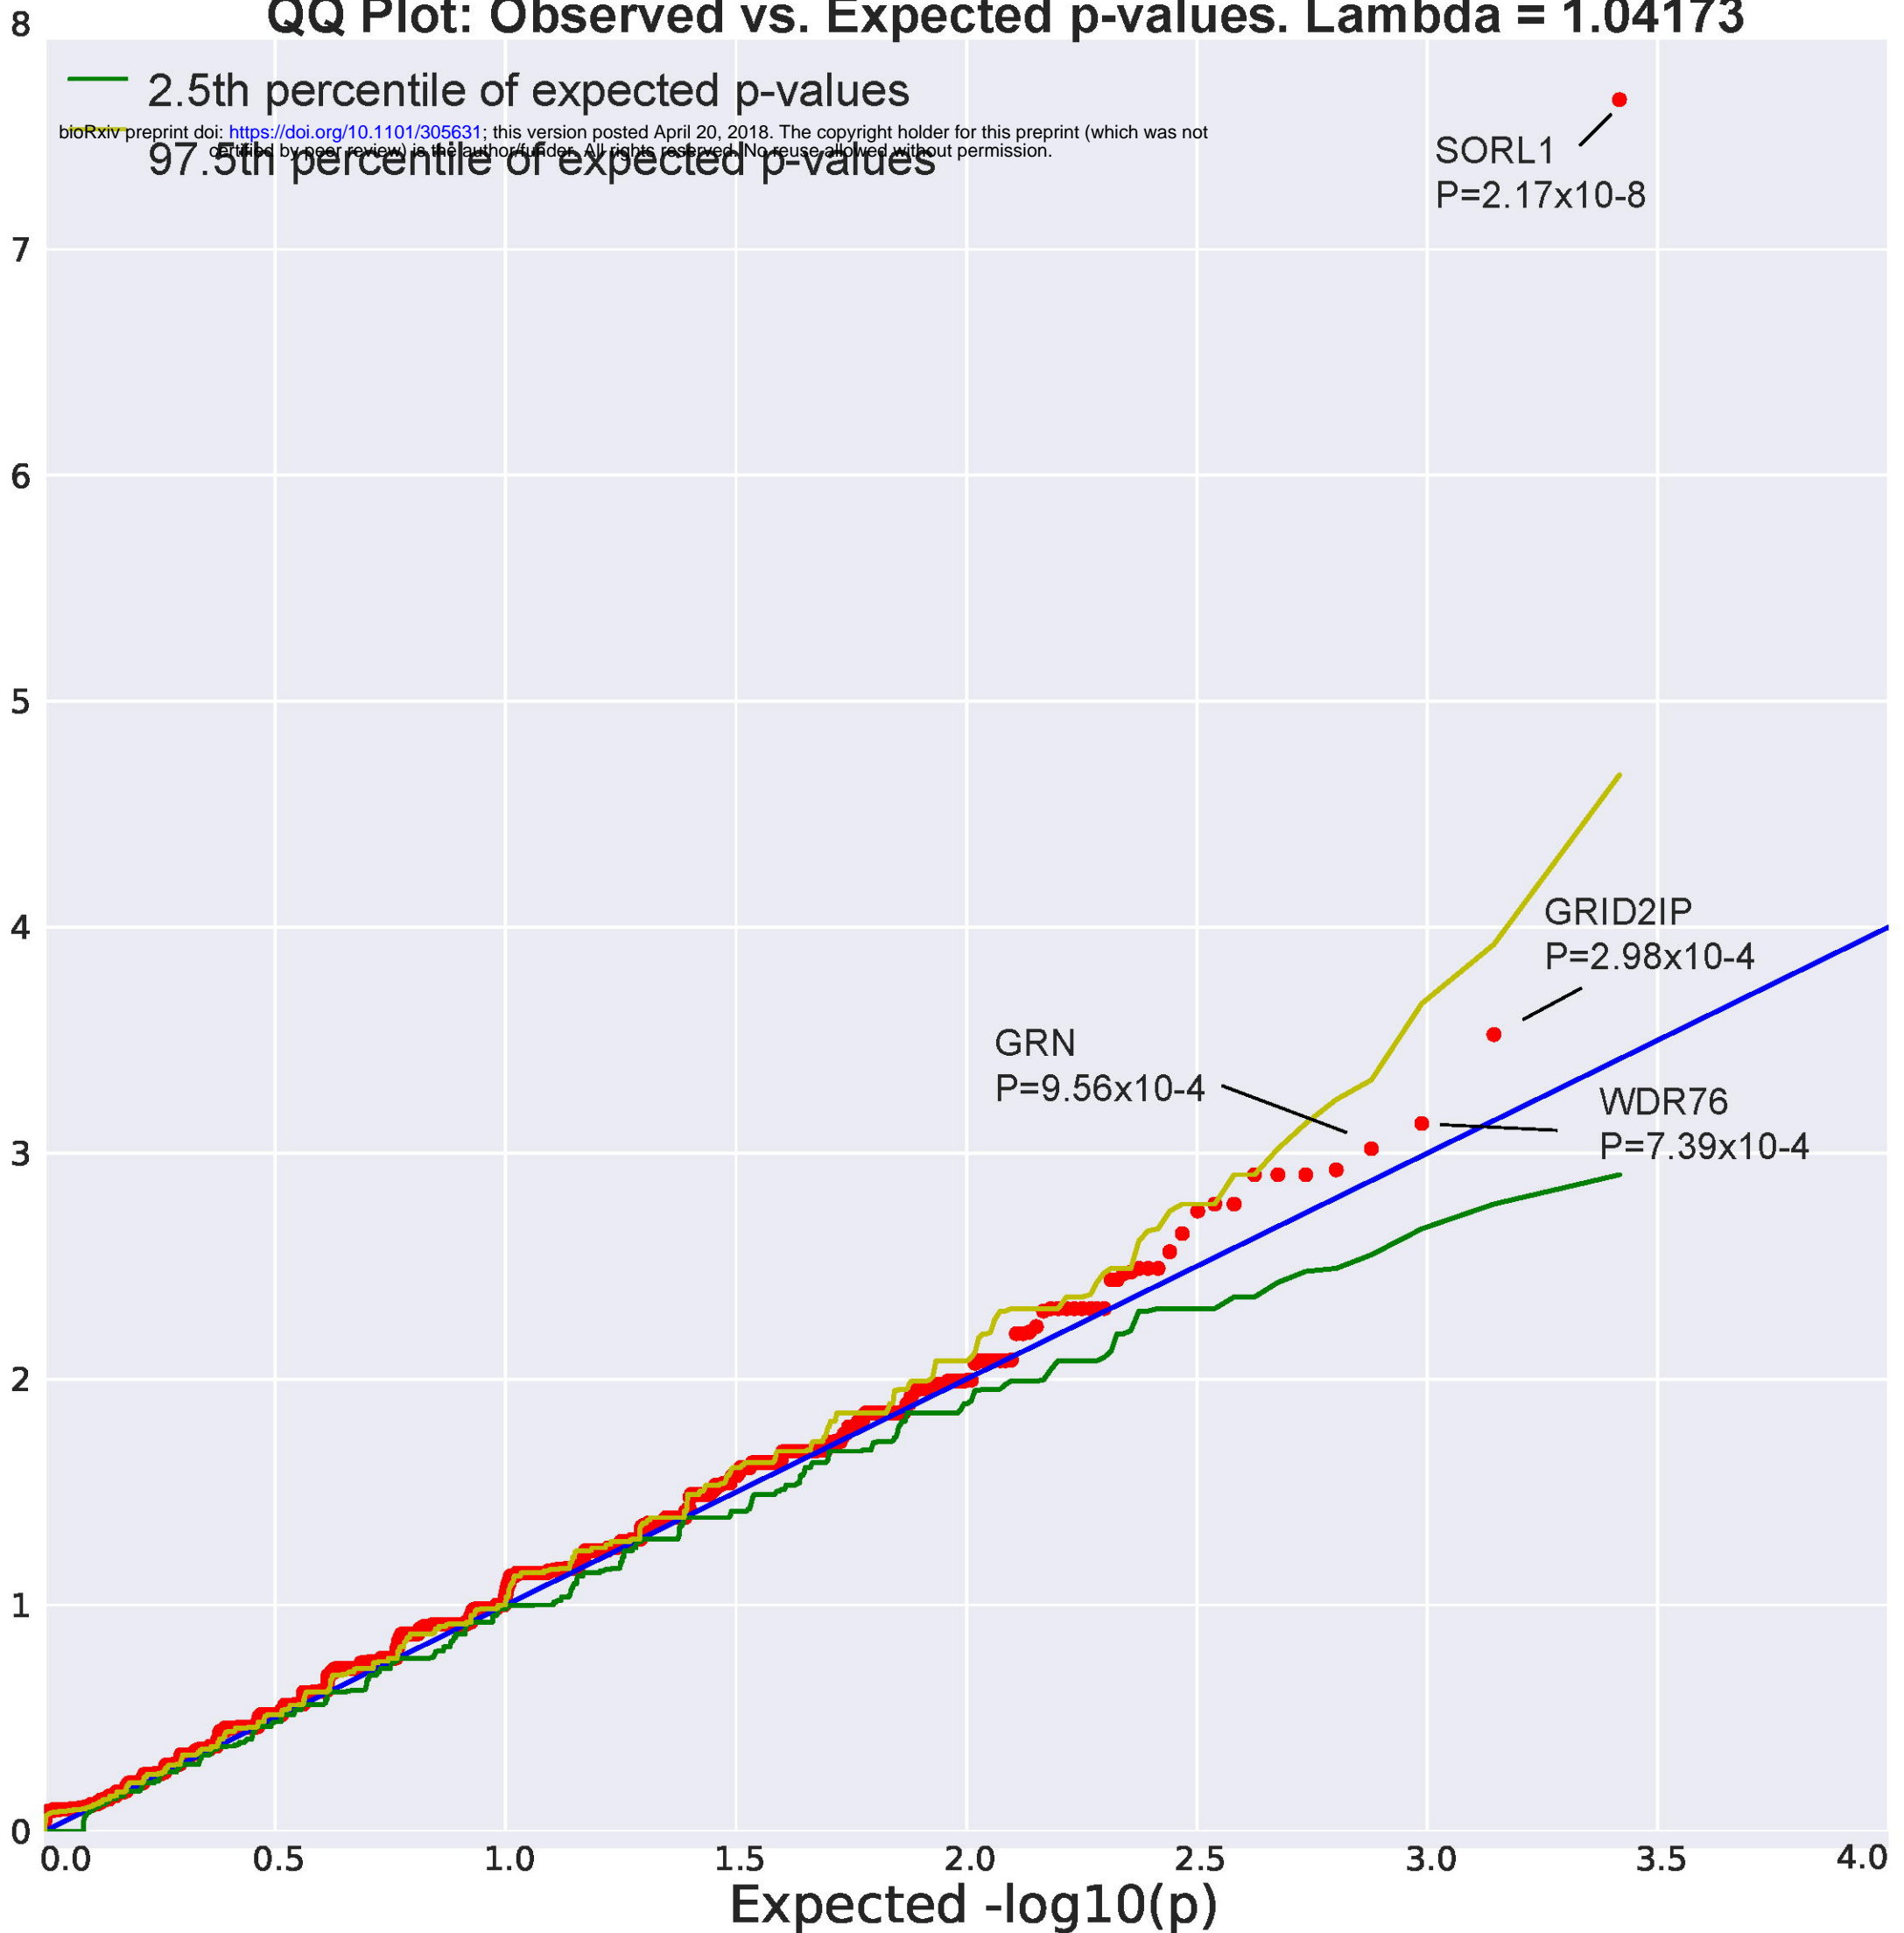

Source: https://www.biorxiv.org/content/10.1101/305631v1.full.pdf
